# Supplementary material
Source: MDPI journal article supplement (https://www.mdpi.com/2297-8739/9/10/314)
Supplement: s1 [file s1]

**Table S1.** The concentration ( $\mu\text{g/g}$  DW) of volatile compounds in *Taraxacum* leaves(A) and roots(B)

[illegible]



|                         | A (in leaves)            |                         |                         |                        |                         |                          |                         | B (in roots)             |                         |                         |                         |                         |                         |                          |
|-------------------------|--------------------------|-------------------------|-------------------------|------------------------|-------------------------|--------------------------|-------------------------|--------------------------|-------------------------|-------------------------|-------------------------|-------------------------|-------------------------|--------------------------|
|                         | 'TK-H'                   | 'TK-Y'                  | 'TK-A'                  | 'A17'                  | 'A44'                   | 'PZ'                     | 'YS'                    | 'TK-H'                   | 'TK-Y'                  | 'TK-A'                  | 'A17'                   | 'A44'                   | 'PZ'                    | 'YS'                     |
| Ethyl nonanoate         | ND                       | 0.43±0.10 <sup>a</sup>  | 0.25±0.10 <sup>a</sup>  | 0.27±0.16 <sup>a</sup> | 0.35±0.03 <sup>a</sup>  | 0.28±0.09 <sup>a</sup>   | 0.41±0.01 <sup>a</sup>  | 1.77±0.28 <sup>b</sup>   | 2.10±0.53 <sup>b</sup>  | 0.67±0.04 <sup>c</sup>  | ND                      | 4.03±0.31 <sup>a</sup>  | ND                      | 0.36±0.01 <sup>cd</sup>  |
| Dibutyl phthalate       | 5.44±0.37 <sup>b</sup>   | 14.61±4.15 <sup>a</sup> | 1.56±0.09 <sup>b</sup>  | ND                     | 2.38±0.40 <sup>b</sup>  | 1.93±0.41 <sup>b</sup>   | 2.71±0.28 <sup>b</sup>  | 39.63±2.43 <sup>a</sup>  | 11.13±1.49 <sup>b</sup> | ND                      | 1.06±0.22 <sup>d</sup>  | 5.13±1.27 <sup>c</sup>  | 0.93±0.14 <sup>d</sup>  | ND                       |
| Dimethyl phthalate      | 11.39±1.21 <sup>a</sup>  | ND                      | ND                      | ND                     | 0.66±0.02 <sup>b</sup>  | 0.28±0.04 <sup>b</sup>   | ND                      | 6.42±1.79 <sup>a</sup>   | ND                      | ND                      | ND                      | 1.02±0.03 <sup>b</sup>  | ND                      | ND                       |
| Methyl salicylate       | 1.56±0.16 <sup>b</sup>   | ND                      | 0.37±0.06 <sup>c</sup>  | 2.28±0.30 <sup>a</sup> | ND                      | 0.48±0.05 <sup>c</sup>   | 0.29±0.03 <sup>c</sup>  | ND                       | 0.35±0.03 <sup>c</sup>  | 0.56±0.06 <sup>b</sup>  | ND                      | 0.71±0.06 <sup>a</sup>  | 0.62±0.04 <sup>ab</sup> | 0.37±0.01 <sup>c</sup>   |
| Dihydroactinidiolide    | 36.84±2.88 <sup>a</sup>  | 11.40±3.93 <sup>b</sup> | 1.57±0.08 <sup>c</sup>  | 1.07±0.03 <sup>c</sup> | 3.32±0.40 <sup>c</sup>  | 1.26±0.23 <sup>c</sup>   | 2.31±0.50 <sup>c</sup>  | 1.24±0.17 <sup>a</sup>   | 0.91±0.03 <sup>b</sup>  | ND                      | ND                      | 0.33±0.11 <sup>c</sup>  | ND                      | 0.09±0.01 <sup>d</sup>   |
| Ethyl tetradecanoate    | 1.27±0.14 <sup>bc</sup>  | 2.09±0.49 <sup>a</sup>  | 0.81±0.05 <sup>cd</sup> | 0.51±0.19 <sup>d</sup> | 1.59±0.18 <sup>ab</sup> | 1.09±0.25 <sup>bcd</sup> | 0.60±0.04 <sup>d</sup>  | 2.93±1.07 <sup>bc</sup>  | 4.10±1.11 <sup>b</sup>  | 2.81±0.22 <sup>bc</sup> | 0.41±0.11 <sup>d</sup>  | 6.15±0.89 <sup>a</sup>  | 0.42±0.07 <sup>d</sup>  | 1.41±0.02 <sup>cd</sup>  |
| Hexyl acetate           | ND                       | ND                      | 0.15±0.01 <sup>c</sup>  | 0.37±0.01 <sup>a</sup> | 0.27±0.02 <sup>b</sup>  | 0.32±0.06 <sup>ab</sup>  | 0.32±0.04 <sup>ab</sup> | ND                       | ND                      | 0.28±0.04 <sup>c</sup>  | 0.47±0.08 <sup>b</sup>  | 0.36±0.02 <sup>c</sup>  | 0.12±0.01 <sup>d</sup>  | 0.58±0.03 <sup>a</sup>   |
| Ethyl acetate           | 0.74±0.03 <sup>a</sup>   | ND                      | ND                      | 0.46±0.15 <sup>b</sup> | ND                      | 0.45±0.12 <sup>b</sup>   | 0.66±0.14 <sup>ab</sup> | 1.28±0.14 <sup>bc</sup>  | 1.51±0.29 <sup>b</sup>  | 0.89±0.10 <sup>cd</sup> | 0.34±0.10 <sup>c</sup>  | 3.79±0.40 <sup>a</sup>  | 0.44±0.13 <sup>de</sup> | 1.39±0.11 <sup>bc</sup>  |
| Ethyl caprylate         | 0.43±0.10 <sup>c</sup>   | 1.85±0.07 <sup>b</sup>  | 0.63±0.05 <sup>c</sup>  | 0.48±0.13 <sup>c</sup> | 4.61±0.64 <sup>a</sup>  | 0.39±0.06 <sup>c</sup>   | 0.77±0.09 <sup>c</sup>  | 1.61±0.17 <sup>b</sup>   | 1.31±0.24 <sup>c</sup>  | 0.59±0.03 <sup>d</sup>  | 0.08±0.00 <sup>c</sup>  | 2.36±0.08 <sup>a</sup>  | 0.17±0.03 <sup>c</sup>  | ND                       |
| Ethyl linolenate        | 5.76±0.87 <sup>a</sup>   | 4.38±1.60 <sup>a</sup>  | 0.81±0.05 <sup>b</sup>  | 0.66±0.19 <sup>b</sup> | 0.70±0.11 <sup>b</sup>  | 0.94±0.16 <sup>b</sup>   | 0.84±0.19 <sup>b</sup>  | 2.31±0.46 <sup>ab</sup>  | 2.16±0.38 <sup>ab</sup> | 1.63±0.22 <sup>b</sup>  | 0.17±0.03 <sup>c</sup>  | 2.86±0.48 <sup>a</sup>  | 0.28±0.01 <sup>c</sup>  | 0.27±0.05 <sup>c</sup>   |
| Ethyl linoleate         | 2.06±0.45 <sup>a</sup>   | 2.36±0.76 <sup>a</sup>  | 0.7±0.01 <sup>b</sup>   | 0.33±0.10 <sup>b</sup> | 0.65±0.13 <sup>b</sup>  | 0.44±0.20 <sup>b</sup>   | 0.42±0.06 <sup>b</sup>  | 7.88±1.20 <sup>b</sup>   | 7.62±1.62 <sup>b</sup>  | 5.69±0.69 <sup>b</sup>  | 0.48±0.07 <sup>c</sup>  | 10.41±1.63 <sup>a</sup> | 0.72±0.04 <sup>c</sup>  | 1.08±0.21 <sup>c</sup>   |
| Methyl palmitate        | 3.17±0.12 <sup>a</sup>   | 0.62±0.26 <sup>b</sup>  | ND                      | ND                     | 0.20±0.04 <sup>c</sup>  | ND                       | ND                      | 1.65±0.31 <sup>a</sup>   | ND                      | 0.61±0.04 <sup>c</sup>  | 0.56±0.12 <sup>cd</sup> | 1.11±0.20 <sup>b</sup>  | 0.20±0.01 <sup>de</sup> | 0.30±0.07 <sup>cde</sup> |
| Ethyl palmitate         | 17.99±1.97 <sup>a</sup>  | 14.83±2.84 <sup>a</sup> | 5.26±0.21 <sup>b</sup>  | 4.18±1.47 <sup>b</sup> | 6.47±1.01 <sup>b</sup>  | 5.28±1.85 <sup>b</sup>   | 3.61±0.23 <sup>b</sup>  | 29.38±5.76 <sup>bc</sup> | 38.29±5.26 <sup>b</sup> | 25.59±2.75 <sup>c</sup> | 3.57±0.07 <sup>d</sup>  | 55.04±5.47 <sup>a</sup> | 4.33±0.17 <sup>d</sup>  | 9.79±2.00 <sup>d</sup>   |
| Ethyl stearate          | ND                       | 0.40±0.13 <sup>a</sup>  | 0.12±0.01 <sup>b</sup>  | ND                     | ND                      | ND                       | ND                      | ND                       | 0.59±0.14 <sup>a</sup>  | 0.26±0.01 <sup>b</sup>  | ND                      | 0.60±0.16 <sup>a</sup>  | ND                      | ND                       |
| Diisobutyl phthalate    | 6.18±0.49 <sup>bcd</sup> | 19.52±1.96 <sup>a</sup> | 4.12±0.29 <sup>cd</sup> | 3.78±0.15 <sup>d</sup> | 6.46±1.07 <sup>bc</sup> | 5.97±1.14 <sup>bcd</sup> | 7.29±0.16 <sup>b</sup>  | 9.68±2.03 <sup>b</sup>   | 21.64±2.20 <sup>a</sup> | 3.54±0.47 <sup>c</sup>  | 1.99±0.44 <sup>c</sup>  | 11.27±0.44 <sup>b</sup> | 2.36±0.33 <sup>c</sup>  | 4.13±1.21 <sup>c</sup>   |
| Ethyl oleate            | ND                       | ND                      | 0.09±0.02 <sup>ab</sup> | 0.05±0.01 <sup>c</sup> | 0.11±0.00 <sup>a</sup>  | 0.07±0.03 <sup>bc</sup>  | ND                      | 0.73±0.15 <sup>b</sup>   | 1.52±0.53 <sup>a</sup>  | 0.52±0.08 <sup>bc</sup> | 0.07±0.01 <sup>c</sup>  | 1.38±0.28 <sup>a</sup>  | 0.08±0.01 <sup>c</sup>  | 0.26±0.03 <sup>bc</sup>  |
| Ethyl laurate           | 0.75±0.09 <sup>d</sup>   | 4.16±0.85 <sup>a</sup>  | 2.01±0.12 <sup>bc</sup> | 0.66±0.26 <sup>d</sup> | 2.40±0.06 <sup>b</sup>  | 0.83±0.29 <sup>d</sup>   | 1.50±0.13 <sup>cd</sup> | 1.52±0.47 <sup>b</sup>   | 1.47±0.44 <sup>b</sup>  | 0.69±0.14 <sup>c</sup>  | ND                      | 2.34±0.38 <sup>a</sup>  | 0.28±0.08 <sup>c</sup>  | 0.57±0.17 <sup>c</sup>   |
| Ethyl hexadec-9-enoate  | 0.34±0.07 <sup>a</sup>   | ND                      | ND                      | ND                     | ND                      | ND                       | ND                      | 0.54±0.01 <sup>b</sup>   | 1.84±0.44 <sup>a</sup>  | 0.17±0.03 <sup>bc</sup> | ND                      | ND                      | ND                      | ND                       |
| Hexyl 2-methylbutanoate | 0.54±0.02 <sup>b</sup>   | 0.85±0.06 <sup>a</sup>  | 0.25±0.01 <sup>c</sup>  | 0.26±0.09 <sup>c</sup> | 0.20±0.05 <sup>c</sup>  | 0.25±0.04 <sup>c</sup>   | ND                      | ND                       | 1.27±0.11 <sup>a</sup>  | ND                      | 1.24±0.21 <sup>a</sup>  | 0.44±0.02 <sup>b</sup>  | ND                      | 0.33±0.00 <sup>b</sup>   |
| Ethyl benzoate          | ND                       | ND                      | ND                      | 0.14±0.03 <sup>b</sup> | ND                      | 0.44±0.02 <sup>a</sup>   | 0.44±0.06 <sup>a</sup>  | ND                       | ND                      | ND                      | ND                      | ND                      | ND                      | ND                       |
| Octyl formate           | ND                       | ND                      | 0.65±0.03 <sup>a</sup>  | ND                     | ND                      | ND                       | ND                      | ND                       | ND                      | ND                      | ND                      | ND                      | ND                      | ND                       |
| Ethyl pentadecanoate    | ND                       | ND                      | ND                      | ND                     | ND                      | ND                       | ND                      | 3.15±0.57 <sup>a</sup>   | 2.00±0.58 <sup>b</sup>  | 0.94±0.10 <sup>c</sup>  | ND                      | 1.91±0.23 <sup>b</sup>  | 0.18±0.01 <sup>cd</sup> | 0.30±0.04 <sup>cd</sup>  |
| Ethyl cinnamate         | ND                       | ND                      | ND                      | ND                     | ND                      | ND                       | ND                      | ND                       | ND                      | 0.25±0.04 <sup>b</sup>  | ND                      | 0.66±0.21 <sup>a</sup>  | ND                      | 0.12±0.04 <sup>bc</sup>  |
| Diethyl Phthalate       | ND                       | ND                      | ND                      | ND                     | ND                      | ND                       | ND                      | 6.85±1.25 <sup>a</sup>   | ND                      | ND                      | ND                      | ND                      | ND                      | ND                       |

|                                               | A (in leaves)           |                         |                        |                        |                         |                        |                         | B (in roots)            |                        |                         |                         |                        |                         |                         |
|-----------------------------------------------|-------------------------|-------------------------|------------------------|------------------------|-------------------------|------------------------|-------------------------|-------------------------|------------------------|-------------------------|-------------------------|------------------------|-------------------------|-------------------------|
|                                               | 'TK-H'                  | 'TK-Y'                  | 'TK-A'                 | 'A17'                  | 'A44'                   | 'PZ'                   | 'YS'                    | 'TK-H'                  | 'TK-Y'                 | 'TK-A'                  | 'A17'                   | 'A44'                  | 'PZ'                    | 'YS'                    |
| 2,2,4-Trimethyl-1,3-pentanediol diisobutyrate | ND                      | ND                      | ND                     | ND                     | ND                      | ND                     | ND                      | 17.04±1.72 <sup>a</sup> | ND                     | ND                      | ND                      | 4.87±1.29 <sup>b</sup> | ND                      | ND                      |
| Ethyl salicylate                              | ND                      | ND                      | ND                     | ND                     | ND                      | ND                     | ND                      | ND                      | ND                     | ND                      | ND                      | ND                     | ND                      | 0.40±0.05 <sup>a</sup>  |
| <b>Ketones</b>                                |                         |                         |                        |                        |                         |                        |                         |                         |                        |                         |                         |                        |                         |                         |
| 2(5H)-Furanone                                | 0.53±0.04 <sup>b</sup>  | ND                      | ND                     | 0.47±0.02 <sup>c</sup> | 0.34±0.03 <sup>d</sup>  | 0.71±0.03 <sup>a</sup> | ND                      | ND                      | ND                     | 0.44±0.06 <sup>b</sup>  | 0.78±0.08 <sup>a</sup>  | 0.42±0.06 <sup>b</sup> | 0.78±0.19 <sup>a</sup>  | ND                      |
| β-Ionone                                      | 24.66±0.78 <sup>a</sup> | 16.17±4.38 <sup>b</sup> | 2.89±0.01 <sup>c</sup> | 3.19±0.11 <sup>c</sup> | 7.30±0.36 <sup>c</sup>  | 4.09±0.57 <sup>c</sup> | 7.25±2.24 <sup>c</sup>  | ND                      | 1.78±0.12 <sup>a</sup> | ND                      | ND                      | ND                     | ND                      | ND                      |
| 3,5-Octadien-2-one                            | 6.62±0.14 <sup>a</sup>  | 6.21±0.85 <sup>a</sup>  | 1.40±0.03 <sup>d</sup> | 0.97±0.18 <sup>d</sup> | 3.72±0.09 <sup>b</sup>  | 1.31±0.00 <sup>d</sup> | 2.51±0.07 <sup>c</sup>  | 1.58±0.18 <sup>b</sup>  | 3.35±0.31 <sup>a</sup> | 1.17±0.07 <sup>bc</sup> | 0.52±0.07 <sup>d</sup>  | 2.83±0.26 <sup>a</sup> | 0.65±0.09 <sup>d</sup>  | 0.80±0.10 <sup>cd</sup> |
| Perhydrofarnesyl acetone                      | 4.87±0.31 <sup>a</sup>  | 1.15±0.39 <sup>b</sup>  | 0.14±0.03 <sup>c</sup> | 0.19±0.01 <sup>c</sup> | 0.61±0.15 <sup>c</sup>  | 0.31±0.09 <sup>c</sup> | ND                      | ND                      | ND                     | ND                      | ND                      | 0.48±0.02 <sup>a</sup> | ND                      | 0.21±0.07 <sup>b</sup>  |
| Geranyl acetone                               | 1.56±0.88 <sup>b</sup>  | 2.36±0.59 <sup>a</sup>  | 0.47±0.02 <sup>c</sup> | 0.52±0.01 <sup>c</sup> | 0.84±0.07 <sup>c</sup>  | 0.54±0.04 <sup>c</sup> | 0.82±0.14 <sup>c</sup>  | 4.00±0.68 <sup>a</sup>  | 1.88±0.23 <sup>b</sup> | 0.40±0.01 <sup>c</sup>  | 0.36±0.01 <sup>c</sup>  | 1.71±0.01 <sup>b</sup> | 0.36±0.00 <sup>c</sup>  | 0.47±0.12 <sup>c</sup>  |
| 6-Methylhept-5-en-2-one                       | ND                      | 0.34±0.01 <sup>a</sup>  | 0.15±0.05 <sup>c</sup> | 0.14±0.03 <sup>c</sup> | 0.25±0.05 <sup>b</sup>  | 0.13±0.03 <sup>c</sup> | 0.19±0.02 <sup>bc</sup> | 0.87±0.19 <sup>a</sup>  | 0.33±0.03 <sup>b</sup> | ND                      | ND                      | 0.47±0.02 <sup>b</sup> | 0.11±0.01 <sup>c</sup>  | 0.15±0.01 <sup>c</sup>  |
| 3-Hydroxy-2,3-dihydromaltol                   | 2.24±0.33 <sup>a</sup>  | ND                      | 1.37±0.02 <sup>b</sup> | ND                     | ND                      | ND                     | ND                      | 2.74±0.49 <sup>a</sup>  | ND                     | 1.04±0.25 <sup>b</sup>  | 0.75±0.03 <sup>b</sup>  | ND                     | 1.14±0.06 <sup>b</sup>  | 0.76±0.06 <sup>b</sup>  |
| 2-Hydroxy-5-methyl acetophenone               | ND                      | ND                      | 0.16±0.05 <sup>a</sup> | 0.07±0.01 <sup>b</sup> | ND                      | ND                     | ND                      | 1.70±0.16 <sup>a</sup>  | 0.47±0.02 <sup>b</sup> | 0.67±0.18 <sup>b</sup>  | ND                      | ND                     | 0.10±0.02 <sup>c</sup>  | ND                      |
| Acetophenone                                  | 0.96±0.49 <sup>a</sup>  | 1.04±0.19 <sup>a</sup>  | 0.34±0.09 <sup>b</sup> | ND                     | 0.60±0.02 <sup>ab</sup> | 0.37±0.07 <sup>b</sup> | 0.43±0.02 <sup>b</sup>  | ND                      | ND                     | 0.19±0.03 <sup>a</sup>  | ND                      | ND                     | ND                      | 0.18±0.00 <sup>a</sup>  |
| 2-Nonanone                                    | ND                      | ND                      | ND                     | ND                     | 0.67±0.01 <sup>a</sup>  | ND                     | ND                      | ND                      | ND                     | ND                      | ND                      | ND                     | ND                      | ND                      |
| (E,E)-3,5-octadien-2-one                      | ND                      | 5.30±0.85 <sup>a</sup>  | 1.00±0.04 <sup>c</sup> | 0.61±0.05 <sup>c</sup> | 2.43±0.06 <sup>b</sup>  | ND                     | ND                      | ND                      | ND                     | ND                      | ND                      | ND                     | ND                      | ND                      |
| 2-Pyrrolidinone                               | 1.29±0.54 <sup>a</sup>  | 1.78±0.32 <sup>a</sup>  | 0.46±0.05 <sup>b</sup> | ND                     | ND                      | ND                     | ND                      | ND                      | ND                     | ND                      | ND                      | ND                     | ND                      | ND                      |
| β-ionone 5,6-epoxide                          | 11.74±0.63 <sup>a</sup> | 7.64±1.99 <sup>b</sup>  | 1.36±0.00 <sup>c</sup> | 1.16±0.11 <sup>c</sup> | 2.73±0.21 <sup>c</sup>  | 1.20±0.16 <sup>c</sup> | 2.28±0.65 <sup>c</sup>  | ND                      | ND                     | ND                      | ND                      | ND                     | ND                      | ND                      |
| 2,3-Butanedione                               | ND                      | 0.59±0.04 <sup>a</sup>  | ND                     | ND                     | ND                      | ND                     | ND                      | ND                      | ND                     | ND                      | ND                      | ND                     | ND                      | ND                      |
| 3-Pentanone                                   | ND                      | ND                      | 0.28±0.04 <sup>a</sup> | ND                     | ND                      | 0.25±0.05 <sup>a</sup> | ND                      | ND                      | ND                     | ND                      | ND                      | ND                     | ND                      | ND                      |
| 4'-Methylacetophenone                         | ND                      | 0.30±0.02 <sup>a</sup>  | ND                     | ND                     | ND                      | 0.10±0.00 <sup>b</sup> | ND                      | ND                      | ND                     | ND                      | ND                      | ND                     | ND                      | ND                      |
| 3-Ethyl-4-methylpyrrole-2,5-dione             | 4.48±0.32 <sup>a</sup>  | 1.45±0.36 <sup>b</sup>  | 0.29±0.01 <sup>c</sup> | ND                     | 0.56±0.04 <sup>c</sup>  | ND                     | 0.26±0.03 <sup>c</sup>  | ND                      | ND                     | ND                      | ND                      | ND                     | ND                      | ND                      |
| Acetoin                                       | ND                      | ND                      | ND                     | ND                     | ND                      | ND                     | ND                      | ND                      | 1.00±0.15 <sup>a</sup> | 0.65±0.12 <sup>b</sup>  | 0.26±0.03 <sup>cd</sup> | 1.02±0.17 <sup>a</sup> | 0.06±0.01 <sup>de</sup> | 0.38±0.06 <sup>c</sup>  |
| 3-Octen-2-one                                 | ND                      | ND                      | ND                     | ND                     | ND                      | ND                     | ND                      | ND                      | ND                     | ND                      | 0.07±0.00 <sup>c</sup>  | 0.70±0.03 <sup>a</sup> | ND                      | 0.23±0.03 <sup>b</sup>  |

[illegible]

|                           | A (in leaves)           |                        |                         |                        |                         |                         |                        | B (in roots)            |                         |                         |                         |                          |                         |                         |
|---------------------------|-------------------------|------------------------|-------------------------|------------------------|-------------------------|-------------------------|------------------------|-------------------------|-------------------------|-------------------------|-------------------------|--------------------------|-------------------------|-------------------------|
|                           | 'TK-H'                  | 'TK-Y'                 | 'TK-A'                  | 'A17'                  | 'A44'                   | 'PZ'                    | 'YS'                   | 'TK-H'                  | 'TK-Y'                  | 'TK-A'                  | 'A17'                   | 'A44'                    | 'PZ'                    | 'YS'                    |
| <b>Alkanes</b>            |                         |                        |                         |                        |                         |                         |                        |                         |                         |                         |                         |                          |                         |                         |
| Pristane                  | 0.96±0.09 <sup>a</sup>  | ND                     | ND                      | ND                     | ND                      | ND                      | ND                     | 2.05±0.28 <sup>a</sup>  | ND                      | ND                      | ND                      | ND                       | ND                      | ND                      |
| 3,5-Dimethylundecane      | ND                      | ND                     | 0.17±0.05 <sup>b</sup>  | ND                     | 0.37±0.08 <sup>b</sup>  | ND                      | 0.95±0.27 <sup>a</sup> | ND                      | ND                      | ND                      | ND                      | 0.43±0.02 <sup>a</sup>   | ND                      | 0.32±0.03 <sup>b</sup>  |
| 3-Methyltridecane         | 0.38±0.01 <sup>b</sup>  | 0.55±0.09 <sup>a</sup> | 0.22±0.00 <sup>cd</sup> | 0.17±0.01 <sup>d</sup> | 0.30±0.03 <sup>bc</sup> | 0.29±0.03 <sup>bc</sup> | 0.37±0.05 <sup>b</sup> | ND                      | 0.51±0.03 <sup>b</sup>  | 0.32±0.06 <sup>cd</sup> | 0.24±0.03 <sup>de</sup> | 0.84±0.12 <sup>a</sup>   | 0.12±0.02 <sup>ef</sup> | 0.46±0.06 <sup>bc</sup> |
| 3-Methylpentadecane       | 0.80±0.07 <sup>a</sup>  | 0.67±0.14 <sup>a</sup> | ND                      | 0.13±0.02 <sup>b</sup> | 0.15±0.01 <sup>b</sup>  | 0.18±0.00 <sup>b</sup>  | 0.22±0.02 <sup>b</sup> | 1.32±0.30 <sup>a</sup>  | 0.62±0.09 <sup>bc</sup> | ND                      | ND                      | 0.65±0.13 <sup>b</sup>   | 0.09±0.00 <sup>d</sup>  | 0.32±0.05 <sup>cd</sup> |
| <b>Ethers</b>             |                         |                        |                         |                        |                         |                         |                        |                         |                         |                         |                         |                          |                         |                         |
| Dimethyl ether            | 20.02±2.45 <sup>a</sup> | ND                     | 10.17±0.65 <sup>b</sup> | ND                     | 12.08±0.62 <sup>b</sup> | ND                      | ND                     | 22.30±2.02 <sup>a</sup> | ND                      | 16.86±4.22 <sup>b</sup> | 6.69±0.70 <sup>c</sup>  | 18.88±1.82 <sup>ab</sup> | 5.56±0.49 <sup>c</sup>  | ND                      |
| 4-n-Propylanisole         | ND                      | 0.45±0.12 <sup>a</sup> | ND                      | ND                     | ND                      | 0.13±0.01 <sup>b</sup>  | ND                     | ND                      | ND                      | ND                      | ND                      | ND                       | ND                      | ND                      |
| Anethole                  | ND                      | ND                     | ND                      | ND                     | ND                      | ND                      | ND                     | 32.63±1.96 <sup>a</sup> | 1.62±0.03 <sup>b</sup>  | ND                      | ND                      | ND                       | ND                      | ND                      |
| Estragole                 | ND                      | ND                     | ND                      | ND                     | ND                      | ND                      | ND                     | 0.59±0.15 <sup>a</sup>  | ND                      | ND                      | ND                      | ND                       | ND                      | ND                      |
| <b>Phenols</b>            |                         |                        |                         |                        |                         |                         |                        |                         |                         |                         |                         |                          |                         |                         |
| Butylated hydroxytoluene  | ND                      | ND                     | ND                      | ND                     | ND                      | ND                      | 0.51±0.13 <sup>a</sup> | ND                      | 2.17±0.43 <sup>a</sup>  | ND                      | 0.51±0.02 <sup>b</sup>  | ND                       | 0.36±0.05 <sup>b</sup>  | ND                      |
| 2-Methoxy-4-vinylphenol   | 0.74±0.00 <sup>a</sup>  | ND                     | ND                      | ND                     | ND                      | ND                      | ND                     | 1.78±0.25 <sup>a</sup>  | ND                      | ND                      | ND                      | ND                       | ND                      | ND                      |
| 2,4-Di-t-butylphenol      | ND                      | ND                     | ND                      | ND                     | ND                      | ND                      | 0.38±0.07 <sup>a</sup> | 1.22±0.36 <sup>a</sup>  | ND                      | ND                      | ND                      | 0.58±0.07 <sup>b</sup>   | ND                      | ND                      |
| Carvacrol                 | ND                      | ND                     | ND                      | ND                     | ND                      | ND                      | ND                     | ND                      | ND                      | ND                      | 0.29±0.00 <sup>b</sup>  | ND                       | ND                      | 0.74±0.23 <sup>a</sup>  |
| p-Cresol                  | ND                      | ND                     | ND                      | ND                     | ND                      | ND                      | ND                     | ND                      | ND                      | ND                      | 0.37±0.06 <sup>a</sup>  | ND                       | ND                      | 0.21±0.03 <sup>b</sup>  |
| Eugenol                   | ND                      | ND                     | ND                      | ND                     | ND                      | ND                      | ND                     | ND                      | 1.00±0.15 <sup>a</sup>  | ND                      | ND                      | ND                       | ND                      | ND                      |
| <b>Furans</b>             |                         |                        |                         |                        |                         |                         |                        |                         |                         |                         |                         |                          |                         |                         |
| 2-Pentylfuran             | 0.99±0.00 <sup>d</sup>  | 2.18±0.05 <sup>a</sup> | 0.65±0.03 <sup>c</sup>  | 0.37±0.01 <sup>f</sup> | 1.24±0.13 <sup>c</sup>  | 0.89±0.09 <sup>d</sup>  | 1.44±0.15 <sup>b</sup> | 2.04±0.28 <sup>b</sup>  | 2.14±0.56 <sup>b</sup>  | 0.94±0.20 <sup>cd</sup> | 0.58±0.12 <sup>d</sup>  | 3.77±0.05 <sup>a</sup>   | 0.72±0.10 <sup>d</sup>  | 1.40±0.09 <sup>c</sup>  |
| 2,5-Furandicarboxaldehyde | ND                      | ND                     | ND                      | ND                     | ND                      | ND                      | ND                     | ND                      | ND                      | ND                      | 0.21±0.04 <sup>a</sup>  | ND                       | ND                      | ND                      |
| 2-Propionylfuran          | ND                      | ND                     | ND                      | ND                     | ND                      | ND                      | ND                     | 1.68±0.07 <sup>a</sup>  | ND                      | 0.62±0.02 <sup>b</sup>  | ND                      | ND                       | 0.33±0.08 <sup>c</sup>  | 0.52±0.08 <sup>b</sup>  |
| <b>Pyrazines</b>          |                         |                        |                         |                        |                         |                         |                        |                         |                         |                         |                         |                          |                         |                         |
| Tetramethylpyrazine       | ND                      | 1.58±0.12 <sup>a</sup> | ND                      | ND                     | ND                      | ND                      | ND                     | 9.72±1.16 <sup>a</sup>  | 1.37±0.08 <sup>b</sup>  | ND                      | ND                      | ND                       | ND                      | ND                      |
| 2,3,5-Trimethylpyrazine   | ND                      | ND                     | ND                      | ND                     | ND                      | ND                      | ND                     | ND                      | ND                      | 0.58±0.18 <sup>a</sup>  | ND                      | ND                       | ND                      | ND                      |

|                              | A (in leaves)          |                        |                        |                        |                        |                        |                        | B (in roots)           |                        |                        |                        |                        |                        |                        |
|------------------------------|------------------------|------------------------|------------------------|------------------------|------------------------|------------------------|------------------------|------------------------|------------------------|------------------------|------------------------|------------------------|------------------------|------------------------|
|                              | 'TK-H'                 | 'TK-Y'                 | 'TK-A'                 | 'A17'                  | 'A44'                  | 'PZ'                   | 'YS'                   | 'TK-H'                 | 'TK-Y'                 | 'TK-A'                 | 'A17'                  | 'A44'                  | 'PZ'                   | 'YS'                   |
| 2,3-Dimethyl-5-ethylpyrazine | ND                     | 0.71±0.08 <sup>a</sup> | ND                     | ND                     | ND                     | ND                     |
| 2,6-Diethylpyrazine          | ND                     | 0.7±0.04 <sup>a</sup>  | ND                     | 0.61±0.05 <sup>a</sup> | 0.10±0.01 <sup>c</sup> | ND                     | 0.13±0.01 <sup>c</sup> | 0.42±0.11 <sup>b</sup> |
| 2-Ethyl-5-methylpyrazine     | ND                     | 0.89±0.16 <sup>a</sup> | 0.56±0.00 <sup>b</sup> | ND                     | ND                     | ND                     |
| <b>Others</b>                |                        |                        |                        |                        |                        |                        |                        |                        |                        |                        |                        |                        |                        |                        |
| Benzothiazole                | 1.59±0.13 <sup>a</sup> | ND                     | 0.76±0.03 <sup>b</sup> | ND                     | 0.54±0.03 <sup>c</sup> | ND                     | ND                     | 3.83±0.39 <sup>a</sup> | 1.84±0.12 <sup>b</sup> | ND                     | ND                     | ND                     | ND                     | 0.38±0.07 <sup>c</sup> |
| 2-Acetylpyrrole              | 3.02±0.05 <sup>a</sup> | ND                     | 2.24±0.02 <sup>b</sup> | 0.35±0.12 <sup>d</sup> | ND                     | 0.57±0.07 <sup>c</sup> | 0.25±0.05 <sup>d</sup> | 9.16±1.70 <sup>a</sup> | ND                     | 0.98±0.33 <sup>b</sup> | 0.43±0.13 <sup>b</sup> | ND                     | 0.36±0.05 <sup>b</sup> | 0.44±0.18 <sup>b</sup> |
| Ethanethiol                  | ND                     | 3.17±0.47 <sup>a</sup> | 3.04±0.01 <sup>a</sup> | 1.72±0.46 <sup>b</sup> | 1.37±0.28 <sup>b</sup> | 4.04±0.57 <sup>a</sup> | 3.32±1.09 <sup>a</sup> | ND                     | ND                     | 2.12±0.57 <sup>a</sup> | 0.58±0.05 <sup>c</sup> | ND                     | 1.45±0.24 <sup>b</sup> | ND                     |
| Dimethyl sulfoxide           | 1.01±0.30 <sup>a</sup> | ND                     | 0.56±0.06 <sup>b</sup> | 0.53±0.01 <sup>b</sup> | 0.41±0.15 <sup>b</sup> | 0.90±0.01 <sup>a</sup> | ND                     | 4.21±0.75 <sup>a</sup> | ND                     | 0.31±0.06 <sup>b</sup> | ND                     | ND                     | ND                     | ND                     |
| o-Tolunitrile                | ND                     | 0.67±0.09 <sup>a</sup> | ND                     |
| Pyrazinamide                 | ND                     | 0.25±0.02 <sup>a</sup> | 0.21±0.05 <sup>a</sup> | ND                     | 0.15±0.01 <sup>b</sup> | 0.13±0.03 <sup>b</sup> |
| Indole                       | ND                     | 8.51±2.02 <sup>a</sup> | ND                     | ND                     | ND                     | ND                     | ND                     | ND                     |
| Dimethyl sulfide             | ND                     | 0.74±0.02 <sup>a</sup> | ND                     | 0.51±0.03 <sup>b</sup> |

'TK-H', 'TK-Y' and 'TK-A' are *Taraxacum kok-saghyz* Rodin samples from three different habitats; 'A17', 'A44', 'PZ' and 'YS' are *Taraxacum officinale* samples from the same habitats. Values (means±SD) with the same letters in the same row indicate no significant difference ( $P < 0.05$ , VCs in leaves and roots were analyzed respectively). ND: not detected.
